# Supplementary material for: A comprehensive phylogeny of birds (Aves) using targeted next-generation DNA sequencing
Source: Springer Nature journal article supplement (doi:10.1038/nature15697), 2015-10-01
Supplement: 41586_2015_BFnature15697_MOESM350_ESM.pdf [file 41586_2015_BFnature15697_MOESM350_ESM.pdf]

**Supplementary Table 1 The avian taxa and outgroups analyzed in this study. Alphabetical by genus.** Table provides the taxonomic family, the source institution, catalog/tissue number, and locality for each specimen. Taxonomy follows Gill and Donsker (2015; fifth ed). Crocodylian outgroup genera– *Caiman* and *Crocodylus*– are marked with an \*. Institution codes (with the total number of specimens contributed to the study): **AMNH**- American Museum of Natural History (1); **ANSP**- Academy of Natural Sciences of Philadelphia (1); **FMNH**- Field Museum of Natural History (6); **KU**- University of Kansas Natural History Museum and Biodiversity Research Center (46); **ROM**- Royal Ontario Museum (3); **UWBM**- University of Washington Burke Museum of Natural History (17); **YPM**- Yale Peabody Museum of Natural History (125).

| Genus               | Species              | Family            | Inst. | Number | Locality                                |
|---------------------|----------------------|-------------------|-------|--------|-----------------------------------------|
| <i>Acanthisitta</i> | <i>chloris</i>       | Acanthisittidae   | ROM   | RIFL   | New Zealand: South Island               |
| <i>Accipiter</i>    | <i>superciliosus</i> | Accipitridae      | YPM   | 3790   | Suriname: Tafelberg                     |
| <i>Aegotheles</i>   | <i>insignis</i>      | Aegothelidae      | KU    | 16098  | Papua New Guinea: Madang                |
| <i>Alcedo</i>       | <i>quadribrachys</i> | Alcedinidae       | YPM   | 495    | Equatorial Guinea: Monte Alen Nat. Park |
| <i>Anas</i>         | <i>superciliosa</i>  | Anatidae          | YPM   | 3154   | Australia: Victoria, Melbourne          |
| <i>Anhinga</i>      | <i>anhinga</i>       | Anhingidae        | KU    | 3106   | No Data                                 |
| <i>Anser</i>        | <i>canagicus</i>     | Anatidae          | YPM   | 6059   | Captivity                               |
| <i>Anseranas</i>    | <i>semipalmata</i>   | Anseranatidae     | YPM   | 3158   | Australia: Victoria, Lara               |
| <i>Apaloderma</i>   | <i>aequatoriale</i>  | Trogonidae        | YPM   | 295    | Equatorial Guinea: Monte Alen Nat. Park |
| <i>Apteryx</i>      | <i>matelli</i>       | Apterygidae       | KU    | 14905  | New Zealand: North Island               |
| <i>Aramus</i>       | <i>guarauna</i>      | Aramidae          | UWBM  | 90368  | USA: Florida, Pinellas                  |
| <i>Archilochus</i>  | <i>colubris</i>      | Trochilidae       | YPM   | 5465   | USA: Connecticut, Shelton               |
| <i>Ardea</i>        | <i>herodias</i>      | Ardeidae          | YPM   | 2800   | USA: Connecticut, Madison               |
| <i>Ardeotis</i>     | <i>kori</i>          | Otididae          | YPM   | 5967   | Captivity                               |
| <i>Arenaria</i>     | <i>interpres</i>     | Scolopacidae      | YPM   | 3383   | USA: Connecticut, New Haven             |
| <i>Atelornis</i>    | <i>pittoides</i>     | Brachypteraciidae | FMNH  | 384759 | Madagascar: RNI d'Andohahela            |
| <i>Aythya</i>       | <i>valisineria</i>   | Anatidae          | YPM   | 6097   | Captivity                               |
| <i>Balaeniceps</i>  | <i>rex</i>           | Balaenicipitidae  | YPM   | 5404   | Captivity                               |

|                        |                       |               |      |       |                                             |
|------------------------|-----------------------|---------------|------|-------|---------------------------------------------|
| <i>Balearica</i>       | <i>regulorum</i>      | Gruidae       | YPM  | 6296  | Captivity                                   |
| <i>Barnardius</i>      | <i>zonarius</i>       | Psittacidae   | KU   | 8723  | Australia                                   |
| <i>Bonasa</i>          | <i>umbellus</i>       | Phasianidae   | YPM  | 5642  | USA: Alaska, Anchorage                      |
| <i>Buccanodon</i>      | <i>duchailui</i>      | Lybiidae      | YPM  | 522   | Equatorial Guinea: Monte Alen Nat. Park     |
| <i>Bucco</i>           | <i>capensis</i>       | Bucconidae    | YPM  | 3690  | Suriname: Tafelberg                         |
| <i>Bucorvus</i>        | <i>leadbeateri</i>    | Bucerotidae   | ROM  | 3250  | Captivity                                   |
| <i>Burhinus</i>        | <i>oedicnemus</i>     | Burhinidae    | YPM  | 1223  | Greece: Crete, Chania                       |
| <i>Buteo</i>           | <i>jamaicensis</i>    | Accipitridae  | YPM  | 86    | El Salvador: San Miguel Volcano             |
| <i>Caiman*</i>         | <i>crocodilus</i>     | Alligatoridae | YPM  | 15451 | Brazil: Rio Tapajós, Teles Pires            |
| <i>Calandrella</i>     | <i>brachydactyla</i>  | Alaudidae     | YPM  | 1245  | Greece: Crete, Heraklion                    |
| <i>Calyptomena</i>     | <i>viridis</i>        | Eurylaimidae  | YPM  | 6323  | Brunei: Bukit Pagon                         |
| <i>Capito</i>          | <i>niger</i>          | Capitonidae   | YPM  | 3617  | Suriname: Tafelberg                         |
| <i>Caprimulgus</i>     | <i>europaeus</i>      | Caprimulgidae | YPM  | 3336  | Serbia: Bujanovac, Prohor Pcinjsk           |
| <i>Caracara</i>        | <i>cheriway</i>       | Falconidae    | YPM  | 2938  | Suriname: Sipaliwini                        |
| <i>Cariama</i>         | <i>cristata</i>       | Cariamidae    | YPM  | 1173  | Uruguay: Cerro Largo, Canada Canas          |
| <i>Casuarius</i>       | <i>bennetti</i>       | Casuariidae   | KU   | 6875  | Papua New Guinea: base Mt. Suckling         |
| <i>Cathartes</i>       | <i>burrovianus</i>    | Cathartidae   | YPM  | 1066  | Uruguay: Artigas, Estancia Mandiyu          |
| <i>Centropus</i>       | <i>bengalensis</i>    | Cuculidae     | KU   | 17932 | Philippines: Batanes, Sabtang Island        |
| <i>Ceratopipra</i>     | <i>erythrocephala</i> | Pipridae      | YPM  | 2249  | Suriname: Sipaliwini                        |
| <i>Chaetura</i>        | <i>brachyura</i>      | Apodidae      | YPM  | 2886  | Suriname: Sipaliwini                        |
| <i>Charadrius</i>      | <i>hiaticula</i>      | Charadriidae  | YPM  | 1289  | Greece: Crete, Heraklion                    |
| <i>Chauna</i>          | <i>torquata</i>       | Anhimidae     | KU   | 1829  | Captivity                                   |
| <i>Chelidoptera</i>    | <i>tenebrosa</i>      | Bucconidae    | YPM  | 5339  | Suriname: Boven Coesewijne Nature Reserve   |
| <i>Chloroceryle</i>    | <i>inda</i>           | Alcedinidae   | YPM  | 5303  | Suriname: Boven Coesewijne Nature Reserve   |
| <i>Chordeiles</i>      | <i>pusillus</i>       | Caprimulgidae | YPM  | 2276  | Suriname: Sipaliwini                        |
| <i>Chroicocephalus</i> | <i>cirrocephalus</i>  | Laridae       | YPM  | 1192  | Uruguay: Tacuarembó, Lago Rincon del Bonete |
| <i>Chunga</i>          | <i>burmeisteri</i>    | Cariamidae    | UWBM | 77230 | Bolivia: Santa Cruz, Laguna Caucaya         |
| <i>Ciconia</i>         | <i>nigra</i>          | Ciconiidae    | YPM  | 1226  | Greece: Evros, Dadia Forest Reserve         |

|                     |                         |                |      |       |                                                    |
|---------------------|-------------------------|----------------|------|-------|----------------------------------------------------|
| <i>Climacterus</i>  | <i>melanura</i>         | Climacteridae  | KU   | 6178  | Australia: West Australia, 20 km W of Gascoyne Jct |
| <i>Coccyzus</i>     | <i>melacoryphus</i>     | Cuculidae      | YPM  | 2065  | Suriname: Sipaliwini                               |
| <i>Colinus</i>      | <i>cristatus</i>        | Odontophoridae | YPM  | 2944  | Suriname: Sipaliwini                               |
| <i>Colius</i>       | <i>colius</i>           | Coliidae       | UWBM | 52764 | South Africa: Free State, Springfontein            |
| <i>Colius</i>       | <i>indicus</i>          | Coliidae       | UWBM | 67124 | South Africa: KwaZulu/Natal, Melmoth               |
| <i>Columba</i>      | <i>livia</i>            | Columbidae     | YPM  | 1232  | Greece: Crete, Rethimno, Arkalu                    |
| <i>Columbina</i>    | <i>minuta</i>           | Columbidae     | YPM  | 2275  | Suriname: Sipaliwini                               |
| <i>Coracias</i>     | <i>cyanogaster</i>      | Coraciidae     | YPM  | 6031  | Captivity                                          |
| <i>Corvus</i>       | <i>albus</i>            | Corvidae       | YPM  | 832   | Equatorial Guinea: Rio Campo                       |
| <i>Corythaeola</i>  | <i>cristata</i>         | Musophagidae   | YPM  | 523   | Equatorial Guinea: Monte Alen Nat. Park            |
| <i>Cotinga</i>      | <i>cayana</i>           | Cotingidae     | YPM  | 2211  | Suriname: Sipaliwini                               |
| <i>Coturnix</i>     | <i>coturnix</i>         | Phasianidae    | YPM  | 4090  | Russia: Krasnodar Krai, Blagoveschenskaya          |
| <i>Crax</i>         | <i>alector</i>          | Cracidae       | YPM  | 1607  | Suriname: Tafelberg                                |
| <i>Crocodylus*</i>  | <i>porosus</i>          | Crocodylidae   | YPM  | 14722 | Palau: Ngerikiil                                   |
| <i>Crypturellus</i> | <i>tataupa</i>          | Tinamidae      | YPM  | 1770  | Bolivia: Santa Cruz, Warnes                        |
| <i>Cryptopipo</i>   | <i>holochlora litae</i> | Pipridae       | UWBM | 76941 | Panama: 51 km NNE Panama City, Rio Esperanza       |
| <i>Cuculus</i>      | <i>optatus</i>          | Cuculidae      | YPM  | 2497  | Russia: Zabaykasky Krai, Krasny Chikoy             |
| <i>Dendrocygna</i>  | <i>viduata</i>          | Anatidae       | YPM  | 6026  | Captivity                                          |
| <i>Deropterus</i>   | <i>accipitrinus</i>     | Psittacidae    | YPM  | 2217  | Suriname: Sipaliwini                               |
| <i>Dromaius</i>     | <i>novaehollandiae</i>  | Dromaiidae     | YPM  | 3380  | Captivity                                          |
| <i>Elaenia</i>      | <i>flavogaster</i>      | Tyrannidae     | YPM  | 5336  | Suriname: Boven Coesewijne Nature Reserve          |
| <i>Elanus</i>       | <i>leucurus</i>         | Accipitridae   | KU   | 9309  | El Salvador: Zaxatecoluca, Animas Abajo            |
| <i>Eudromia</i>     | <i>elegans</i>          | Tinamidae      | YPM  | 5886  | Captivity                                          |
| <i>Eurostopus</i>   | <i>macrotis</i>         | Caprimulgidae  | KU   | 18174 | Philippines: Mindanao, Zamboanga                   |
| <i>Eurylaimus</i>   | <i>ochromalus</i>       | Eurylaimidae   | KU   | 12368 | Malaysia: Sarawak, 25 km S Bintulu                 |
| <i>Eurypyga</i>     | <i>helias</i>           | Eurypygidae    | KU   | 16818 | No Data                                            |
| <i>Falco</i>        | <i>sparverius</i>       | Falconidae     | YPM  | 2079  | Suriname: Sipaliwini                               |

|                       |                       |                |      |        |                                                     |
|-----------------------|-----------------------|----------------|------|--------|-----------------------------------------------------|
| <i>Fregata</i>        | <i>magnificens</i>    | Fregatidae     | KU   | 9129   | El Salvador: Pacific Ocean, ~35 mi S Puerto Triumfo |
| <i>Fringilla</i>      | <i>coelebs</i>        | Fringillidae   | YPM  | 1837   | Russia: Krasnodar Krai, Solenoye                    |
| <i>Fulmarus</i>       | <i>glacialoides</i>   | Procellariidae | KU   | 21828  | New Zealand: North Island, Auckland, Muriwai Beach  |
| <i>Furnarius</i>      | <i>rufus</i>          | Furnariidae    | YPM  | 988    | Uruguay: Artigas, Arroyo Mandiyu                    |
| <i>Galbula</i>        | <i>dea</i>            | Galbulidae     | YPM  | 5315   | Suriname: Boven Coesewijne Nature Reserve           |
| <i>Gallus</i>         | <i>gallus</i>         | Phasianidae    | KU   | 2419   | Captivity; from wild stock from India: Dehra Dun    |
| <i>Gavia</i>          | <i>immer</i>          | Gaviidae       | UWBM | 66928  | USA: Washington, Indianola                          |
| <i>Glareola</i>       | <i>nuchalis</i>       | Glareolidae    | KU   | 19903  | Sierra Leone: Outamba-Kilimi Nat. Park              |
| <i>Grus</i>           | <i>canadensis</i>     | Gruidae        | KU   | 21897  | USA: Kansas, Stafford                               |
| <i>Haematopus</i>     | <i>palliatu</i>       | Haematopodidae | YPM  | 6295   | USA: Connecticut, Cockenoe Island                   |
| <i>Heliornis</i>      | <i>fulica</i>         | Heliornithidae | KU   | 3087   | No Data                                             |
| <i>Hemiprocne</i>     | <i>comata</i>         | Hemiprocnidae  | KU   | 12571  | Philippines: Mindonoro, Barangay Harrison           |
| <i>Hirundinea</i>     | <i>ferruginea</i>     | Tyrannidae     | YPM  | 1183   | Uruguay: Cerro Largo, Rio Yaguaron                  |
| <i>Hymenops</i>       | <i>perspicillatus</i> | Tyrannidae     | YPM  | 1087   | Uruguay: Rivera, Cuchilla de Caraguata              |
| <i>Ibycter</i>        | <i>americanus</i>     | Falconidae     | YPM  | 3574   | Suriname: Tafelberg                                 |
| <i>Indicator</i>      | <i>exilis</i>         | Indicatoridae  | YPM  | 344    | Equatorial Guinea: Monte Alen Nat. Park             |
| <i>Ixobrychus</i>     | <i>minutus</i>        | Ardeidae       | YPM  | 730    | Greece: Crete, Bramiana Lake                        |
| <i>Jacana</i>         | <i>jacana</i>         | Jacanidae      | YPM  | 5911   | Captivity                                           |
| <i>Jynx</i>           | <i>torquilla</i>      | Picidae        | YPM  | 1334   | Greece: Crete, Selakano                             |
| <i>Leipoa</i>         | <i>ocellata</i>       | Megapodiidae   | YPM  | 3178   | Australia: Western Australia Jerramungup            |
| <i>Lepidocolaptes</i> | <i>angustirostris</i> | Furnariidae    | YPM  | 2273   | Suriname: Sipaliwini                                |
| <i>Leptoptilos</i>    | <i>crumeniferus</i>   | Ciconiidae     | KU   | 2661   | Tanzania                                            |
| <i>Leptosomus</i>     | <i>discolor</i>       | Leptosomatidae | FMNH | 449184 | Captivity                                           |
| <i>Leptotila</i>      | <i>rufaxilla</i>      | Columbidae     | YPM  | 1526   | Suriname: Tafelberg                                 |
| <i>Limosa</i>         | <i>lapponica</i>      | Scolopacidae   | YPM  | 5370   | Alaska: North Slope, Sagavanirktok River            |
| <i>Lophorina</i>      | <i>superba</i>        | Paradisaeidae  | YPM  | 6345   | Captivity                                           |
| <i>Malurus</i>        | <i>splendens</i>      | Maluridae      | KU   | 6209   | Australia: West Australia, Kabarri                  |

|                     |                        |                 |      |        |                                                    |
|---------------------|------------------------|-----------------|------|--------|----------------------------------------------------|
| <i>Megalaima</i>    | <i>chrysopogon</i>     | Megalaimidae    | KU   | 17790  | Malaysia: Sabah, Crocker Range Park                |
| <i>Melanopareia</i> | <i>maximiliani</i>     | Melanopareiidae | KU   | 2841   | Paraguay: Presidente Hayes, Campo Largo            |
| <i>Menura</i>       | <i>novaehollandiae</i> | Menuridae       | UWBM | 76638  | Australia: Victoria                                |
| <i>Merops</i>       | <i>muelleri</i>        | Meropidae       | YPM  | 955    | Equatorial Guinea: Wele-Nzas, Altos de Nsork NP    |
| <i>Mesitornis</i>   | <i>unicolor</i>        | Mesitornithidae | FMNH | 345610 | Madagascar: Foret d'Analalava, 7 km N Manantenina  |
| <i>Micrastur</i>    | <i>gilvicollis</i>     | Falconidae      | YPM  | 1413   | Suriname: Tafelberg                                |
| <i>Micropygia</i>   | <i>schomburgkii</i>    | Rallidae        | YPM  | 2961   | Suriname: Sipaliwini                               |
| <i>Momotus</i>      | <i>lessonii</i>        | Momotidae       | YPM  | 111    | El Salvador: Joya del Matazano, Cerro Cacahuatique |
| <i>Monias</i>       | <i>benschi</i>         | Mesitornithidae | FMNH | 438526 | Madagascar: Foret des Mikeas                       |
| <i>Morus</i>        | <i>serrator</i>        | Sulidae         | YPM  | 3160   | Australia: Victoria, Melbourne, Frankston Beach    |
| <i>Myiobius</i>     | <i>barbatus</i>        | Tityridae       | YPM  | 1474   | Suriname: Tafelberg                                |
| <i>Myrmornis</i>    | <i>torquata</i>        | Thamnophilidae  | YPM  | 2182   | Suriname: Sipaliwini                               |
| <i>Myrmothera</i>   | <i>campanisona</i>     | Grallariidae    | YPM  | 3677   | Suriname: Tafelberg                                |
| <i>Neodrepanis</i>  | <i>coruscans</i>       | Eurylaimidae    | FMNH | 345711 | Madagascar: Marosohy Forest,                       |
| <i>Neopelma</i>     | <i>chrysocephalum</i>  | Pipridae        | YPM  | 1712   | Suriname: Kappel Airstrip                          |
| <i>Nestor</i>       | <i>meridionalis</i>    | Psittacidae     | KU   | 14873  | New Zeland: North Island, Titirangi                |
| <i>Nothoprocta</i>  | <i>ornata</i>          | Tinamidae       | YPM  | 1748   | Bolivia: José Manuel Pando, Berenguela             |
| <i>Numida</i>       | <i>meleagris</i>       | Numididae       | UWBM | 52755  | South Africa: Free State, Springfontein            |
| <i>Nyctibius</i>    | <i>griseus</i>         | Nyctibiidae     | YPM  | 2220   | Suriname: Sipaliwini                               |
| <i>Oceanites</i>    | <i>oceanicus</i>       | Hydrobatidae    | AMNH | 3175   | Chile: Valaparíso                                  |
| <i>Oceanodroma</i>  | <i>leucorhoa</i>       | Hydrobatidae    | YPM  | 6008   | USA: Connecticut, Prospect                         |
| <i>Odontophorus</i> | <i>gujanensis</i>      | Odontophoridae  | YPM  | 1619   | Suriname: Tafelberg                                |
| <i>Opisthocomus</i> | <i>hoazin</i>          | Opisthocomus    | KU   | 848    | Peru: Loreto                                       |
| <i>Ortalis</i>      | <i>motmot</i>          | Cracidae        | YPM  | 2963   | Suriname: Sipaliwini                               |
| <i>Oxyruncus</i>    | <i>cristatus</i>       | Oxyruncidae     | YPM  | 3562   | Suriname: Tafelberg                                |
| <i>Oxyura</i>       | <i>jamaicensis</i>     | Anatidae        | YPM  | 3236   | Captivity                                          |
| <i>Pandion</i>      | <i>haliaetus</i>       | Pandionidae     | UWBM | 81668  | USA: Washington, Everett                           |

|                        |                      |                   |      |       |                                                  |
|------------------------|----------------------|-------------------|------|-------|--------------------------------------------------|
| <i>Pedionomus</i>      | <i>torquatus</i>     | Pedionomidae      | ROM  | 2685  | Australia: Victoria                              |
| <i>Pelagodroma</i>     | <i>marina</i>        | Hydrobatidae      | UWBM | 62853 | Australia: New South Wales, Sydney               |
| <i>Pelecanoides</i>    | <i>urinatrix</i>     | Pelecanoididae    | KU   | 10701 | Australia                                        |
| <i>Pelecanus</i>       | <i>occidentalis</i>  | Pelecanidae       | KU   | 15014 | El Salvador: Usulután, Jucuarán                  |
| <i>Phaethon</i>        | <i>rubricauda</i>    | Phaethontidae     | KU   | 2613  | Pacific Ocean: Johnston Atoll                    |
| <i>Phaethornis</i>     | <i>superciliosus</i> | Trochilidae       | YPM  | 1514  | Suriname: Tafelberg                              |
| <i>Phalacrocorax</i>   | <i>brasilianus</i>   | Phalacrocoracidae | KU   | 1658  | No data                                          |
| <i>Phoebastria</i>     | <i>nigripes</i>      | Diomedidae        | UWBM | 82096 | North Pacific Ocean: 31°N 159°W                  |
| <i>Phoenicopterus</i>  | <i>ruber</i>         | Phoenicopteridae  | YPM  | 6069  | Captivity                                        |
| <i>Phoeniculus</i>     | <i>purpureus</i>     | Phoeniculidae     | KU   | 15430 | Ghana: Upper West Region, Gbele Resource Reserve |
| <i>Picus</i>           | <i>canus</i>         | Picidae           | YPM  | 3344  | Serbia: Knjazevac, Babin Zub                     |
| <i>Piprites</i>        | <i>chloris</i>       | Incertae sedis    | YPM  | 1616  | Suriname: Tafelberg                              |
| <i>Pitta</i>           | <i>angolensis</i>    | Pittidae          | KU   | 19788 | Sierra Leone: Kambui Hills Forest Reserve        |
| <i>Podargus</i>        | <i>strigoides</i>    | Podargidae        | YPM  | 3161  | Australia: Victoria, Melbourne                   |
| <i>Poecile</i>         | <i>lugubris</i>      | Paridae           | YPM  | 3321  | Serbia: Bujanovac, Prohor Pcinjsk                |
| <i>Porphyrio</i>       | <i>porphyrio</i>     | Rallidae          | KU   | 22888 | Australia: Northern Territory, Roper River       |
| <i>Probosciger</i>     | <i>aterrimus</i>     | Psittacidae       | YPM  | 5927  | Captivity                                        |
| <i>Psittacus</i>       | <i>erithacus</i>     | Psittacidae       | KU   | 1566  | Cameroon                                         |
| <i>Psittrichas</i>     | <i>fulgidus</i>      | Psittacidae       | YPM  | 5253  | Captivity                                        |
| <i>Psophia</i>         | <i>crepitans</i>     | Psophiidae        | YPM  | 3569  | Suriname: Tafelberg                              |
| <i>Pterocles</i>       | <i>bicinctus</i>     | Pteroclididae     | UWBM | 53231 | South Africa: Gauteng, Rustenburg                |
| <i>Pterodroma</i>      | <i>externa</i>       | Procellariidae    | KU   | 16363 | Pacific Ocean                                    |
| <i>Ptilinopus</i>      | <i>magnificus</i>    | Columbidae        | YPM  | 6298  | Captivity                                        |
| <i>Ptilonorhynchus</i> | <i>violaceus</i>     | Ptilonorhynchidae | KU   | 10756 | Australia                                        |
| <i>Puffinus</i>        | <i>griseus</i>       | Procellariidae    | KU   | 22550 | Fiji                                             |
| <i>Pycnonotus</i>      | <i>urostictus</i>    | Pycnonotidae      | KU   | 18173 | Philippines: Mindanao, Zamboanga, Pasanoca NP    |
| <i>Rallus</i>          | <i>longirostris</i>  | Rallidae          | YPM  | 3386  | USA: Connecticut, Milford                        |
| <i>Ramphastos</i>      | <i>ambiguus</i>      | Ramphastidae      | YPM  | 6061  | Captivity                                        |
| <i>Recurvirostra</i>   | <i>americana</i>     | Recurvirostridae  | KU   | 21    | USA: Kansas, Rooks                               |



|                      |                         |                   |      |        |                                                    |
|----------------------|-------------------------|-------------------|------|--------|----------------------------------------------------|
| <i>Regulus</i>       | <i>ignicapilla</i>      | Regulidae         | YPM  | 1370   | Greece: Crete, Chania, Omalos                      |
| <i>Rhea</i>          | <i>americana</i>        | Rheidae           | UWBM | 72512  | Captivity                                          |
| <i>Rhynchocyclus</i> | <i>olivaceus</i>        | Tyrannidae        | YPM  | 1698   | Suriname: Kappel Airstrip                          |
| <i>Rhynchops</i>     | <i>niger</i>            | Rynchopidae       | KU   | 15950  | USA: Florida, Lee                                  |
| <i>Rollandia</i>     | <i>rolland</i>          | Podicipedidae     | YPM  | 1201   | Uruguay: Colonia, Puerto de Conchillas             |
| <i>Rollulus</i>      | <i>rouloul</i>          | Phasianidae       | KU   | 1587   | Captivity                                          |
| <i>Rostratula</i>    | <i>benghalensis</i>     | Rostratulidae     | KU   | 20061  | Sierra Leone: Outamba-Kilimi Nat. Park             |
| <i>Rupicola</i>      | <i>rupicola</i>         | Cotingidae        | YPM  | 1452   | Suriname: Tafelberg                                |
| <i>Sagittarius</i>   | <i>serpentarius</i>     | Sagittariidae     | AMNH | 9545   | Captivity                                          |
| <i>Sarothrura</i>    | <i>rufa elizabethae</i> | Sarothruridae     | FMNH | 384805 | Uganda: Echuya Forest Reserve                      |
| <i>Schiffornis</i>   | <i>turdina</i>          | Tityridae         | YPM  | 3576   | Suriname: Tafelberg                                |
| <i>Sclerurus</i>     | <i>mexicanus</i>        | Furnariidae       | YPM  | 1586   | Suriname: Tafelberg                                |
| <i>Scopus</i>        | <i>umbretta</i>         | Scopidae          | UWBM | 89784  | Captivity                                          |
| <i>Sericulus</i>     | <i>bakeri</i>           | Ptilonorhynchidae | KU   | 12230  | Papua New Guinea: Madang                           |
| <i>Smithornis</i>    | <i>rufolateralis</i>    | Eurylaimidae      | YPM  | 225    | Equatorial Guinea: Monte Alen Nat. Park            |
| <i>Spheniscus</i>    | <i>humboldti</i>        | Spheniscidae      | UWBM | 85124  | Captivity                                          |
| <i>Spizella</i>      | <i>arborea</i>          | Emberizidae       | KU   | 21896  | USA: Kansas, Lawrence                              |
| <i>Steatornis</i>    | <i>caripensis</i>       | Steatornithidae   | ANSP | 20224  | Ecuador: Napo, Las Palmas                          |
| <i>Sterna</i>        | <i>hirundo</i>          | Sternidae         | YPM  | 4099   | Russia: Krasnodar Krai, Blagoveschenskaya          |
| <i>Streptoprocne</i> | <i>zonaris</i>          | Apodidae          | YPM  | 135    | El Salvador: Joya del Matazano, Cerro Cacahuatique |
| <i>Strix</i>         | <i>varia</i>            | Strigidae         | YPM  | 1208   | USA: Connecticut, New Haven                        |
| <i>Struthio</i>      | <i>camelus</i>          | Struthionidae     | UWBM | 90121  | Captivity                                          |
| <i>Sylvia</i>        | <i>melanocephala</i>    | Sylviidae         | YPM  | 1354   | Greece: Crete, Heraklion                           |
| <i>Syrrhaptes</i>    | <i>paradoxus</i>        | Pteroclididae     | KU   | 20547  | Mongolia: Dornu Gobi, Ulaan Badrakh Soum           |
| <i>Tapera</i>        | <i>naevia</i>           | Cuculidae         | YPM  | 2923   | Suriname: Sipaliwini                               |
| <i>Tauraco</i>       | <i>macrorhynchus</i>    | Musophagidae      | YPM  | 375    | Equatorial Guinea: Monte Alen Nat. Park            |
| <i>Terenura</i>      | <i>callinota</i>        | Thamnophilidae    | YPM  | 3515   | Suriname: Tafelberg                                |

|                     |                     |                   |      |       |                                                    |
|---------------------|---------------------|-------------------|------|-------|----------------------------------------------------|
| <i>Thamnophilus</i> | <i>ruficapillus</i> | Thamnophilidae    | YPM  | 1193  | Uruguay: Colonia, Puerto de Conchillas             |
| <i>Theristicus</i>  | <i>caerulescens</i> | Threskiornithidae | YPM  | 1174  | Uruguay: Cerro Largo, Rio Yaguaron                 |
| <i>Tigrisoma</i>    | <i>lineatum</i>     | Ardeidae          | YPM  | 2212  | Suriname: Sipaliwini, Werehpai                     |
| <i>Tinamus</i>      | <i>major</i>        | Tinamidae         | YPM  | 1774  | Bolivia: Santa Cruz, Ichilo, Puerto Grether        |
| <i>Tityra</i>       | <i>cayana</i>       | Tityridae         | YPM  | 3044  | Suriname: Sipaliwini                               |
| <i>Tockus</i>       | <i>camurus</i>      | Bucerotidae       | YPM  | 937   | Equatorial Guinea: Wele-Nzas, Altos de Nsork NP    |
| <i>Todus</i>        | <i>mexicanus</i>    | Todidae           | YPM  | 1994  | Captivity                                          |
| <i>Topaza</i>       | <i>pella</i>        | Trochilidae       | YPM  | 1489  | Suriname: Tafelberg                                |
| <i>Treron</i>       | <i>calvus</i>       | Columbidae        | YPM  | 447   | Equatorial Guinea: Monte Alen Nat. Park            |
| <i>Tringa</i>       | <i>solitaria</i>    | Scolopacidae      | YPM  | 999   | Uruguay: Artigas, Estancia Mandiyu                 |
| <i>Trogon</i>       | <i>elegans</i>      | Trogonidae        | YPM  | 115   | El Salvador: Joya del Matazano, Cerro Cacahuatique |
| <i>Turdus</i>       | <i>olivater</i>     | Turdidae          | YPM  | 1568  | Suriname: Tafelberg                                |
| <i>Turnix</i>       | <i>ocellatus</i>    | Turnicidae        | KU   | 25985 | Philippines: Luzon, Gonzaga, Mt. Cagua             |
| <i>Tyrannus</i>     | <i>albogularis</i>  | Tyrannidae        | YPM  | 2823  | Suriname: Sipaliwini                               |
| <i>Tyto</i>         | <i>alba</i>         | Tytonidae         | UWBM | 88784 | USA: Washington, Whidbey Island                    |
| <i>Upupa</i>        | <i>epops</i>        | Upupidae          | YPM  | 1920  | Russia: Kasnodar Krai, Bugazkaya Kosa              |
| <i>Uria</i>         | <i>aalge</i>        | Alcidae           | KU   | 25293 | USA: Oregon, Clatsop                               |
| <i>Vultur</i>       | <i>gryphus</i>      | Cathartidae       | YPM  | 5411  | Captivity                                          |
